# Supplementary material for: Methyl-β-cyclodextrin, an actin depolymerizer augments the antiproliferative potential of microtubule-targeting agents
Source: PubMed Central journal article supplement (PMC6529501; doi:10.1038/s41598-019-43947-4), 2019-05-21
Supplement: 41598_2019_43947_MOESM1_ESM.pdf [file 41598_2019_43947_MOESM1_ESM.pdf]

## Supplementary Information

### Methyl- $\beta$ -cyclodextrin, an actin depolymerizer augments the antiproliferative potential of microtubule-targeting agents

Nikita Mundhara <sup>1</sup>, Abhijit Majumder <sup>2\*</sup>, Dulal Panda <sup>1\*</sup>

1. Department of Biosciences and Bioengineering, Indian Institute of Technology Bombay, Mumbai 400076, India. (abhijitm@iitb.ac.in)
2. Department of Chemical Engineering, Indian Institute of Technology Bombay, Mumbai 400076, India. (panda@iitb.ac.in)

#### Tables

**Table S1:** Effects of vinblastine, crocin and taxol on the microtubules in HeLa cells without and with MCD treatment.

|                                   | Microtubule Intensity (a.u.) |                   |
|-----------------------------------|------------------------------|-------------------|
|                                   | No MCD                       | 1 mM MCD          |
| <b>Control</b>                    | 27.2 $\pm$ 1.2               | 26.3 $\pm$ 2      |
| <b>5 nM vinblastine</b>           | 15.5 $\pm$ 2.2 <sup>#</sup>  | 10.3 $\pm$ 1.8 *  |
| <b>2 <math>\mu</math>M crocin</b> | 20.4 $\pm$ 1.5 <sup>#</sup>  | 14.9 $\pm$ 0.8 ** |
| <b>7 nM taxol</b>                 | 34.5 $\pm$ 3.5 <sup>#</sup>  | 45.4 $\pm$ 3.8 *  |

Data were an average  $\pm$  SD of three independent set of experiments (n =50 cells). (p < 0.01 = \* / #) and (p < 0.05 = \*\*), (\*) represents comparison with their respective MCD untreated controls while (#) represents comparison with control (no MCD).

**Table S2:** Rate constant ( $\tau_1$  and  $\tau_2$ ) values of the cell deadhesion.

| Conditions                              | $\tau_1$ (s) * | $\tau_2$ (s) # |
|-----------------------------------------|----------------|----------------|
| Control                                 | 332 ± 7        | 131 ± 3        |
| 1 mM MCD (4 h)                          | 192 ± 15 *     | 158 ± 4 #      |
| 5 nM vinblastine (8 h)                  | 339 ± 5        | 115 ± 2 #      |
| 1 mM MCD (4 h) + 5 nM vinblastine (8 h) | 290 ± 14 *     | 148 ± 2 #      |
| 7 nM taxol (8 h)                        | 326 ± 8        | 156 ± 6 #      |
| 1 mM MCD (4 h) + 7 nM taxol (8 h)       | 224 ± 5 *      | 197 ± 5 #      |

Data were an average ± SD of three independent set of experiments. (n=30 cells). ( $p < 0.01 = */ #$ ). (\*) represents comparison with  $\tau_1$  control whereas (#) represents comparison with  $\tau_2$  controls.

**Table S3:** IC<sub>50</sub> values of vinblastine and taxol in control and MCD treated cells.

| Cell Line | Vinblastine (nM) | 1mM MCD + vinblastine (nM) | Taxol (nM) | 1 mM MCD + taxol (nM) |
|-----------|------------------|----------------------------|------------|-----------------------|
| MCF 7     | 25.9 ± 1.1       | 9.6 ± 0.8 *                | 24.8 ± 0.7 | 10.3 ± 0.9 *          |
| Huh 7     | 72.1 ± 5.9       | 25.6 ± 2.5 *               | 70.8 ± 2.6 | 20.7 ± 1*             |
| PC 3      | 12.3 ± 0.2       | 9.8 ± 0.8 **               | 17.5 ± 1.7 | 11.7 ± 0.17 **        |

Data were an average ± SD of three independent set of experiments. ( $p < 0.01 = *$ ) and ( $p < 0.05 = **$ )

Figure S1

a

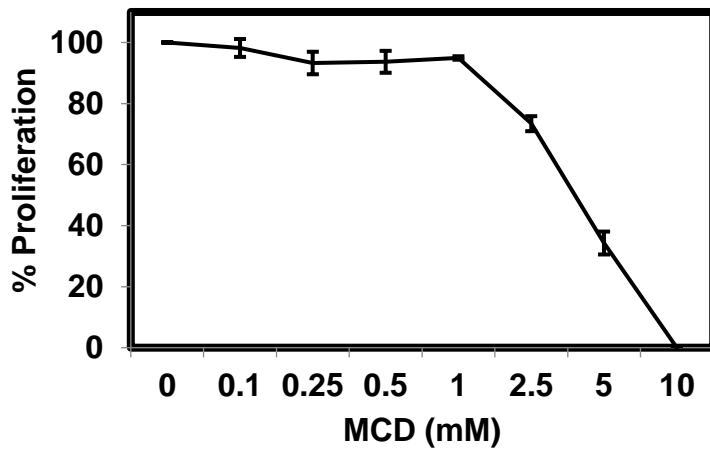

b

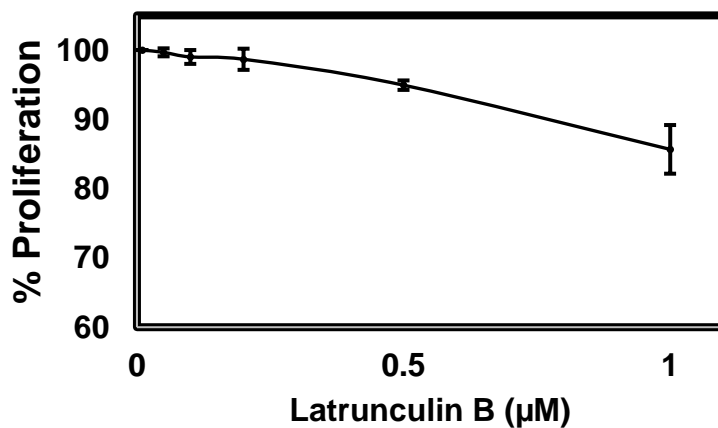

**Supplementary Figure 1: MCD and LAT B inhibited the proliferation of HeLa cells at higher doses.** HeLa cells were treated with different concentrations of MCD and LAT B for 24 h. The inhibition of cell proliferation was calculated by the sulforhodamine B assay. a) Line graph representing inhibition of cell proliferation upon increasing concentrations of MCD b) LAT B. Data are averages of three independent experiments, and error bars represent the SD.

Figure S2

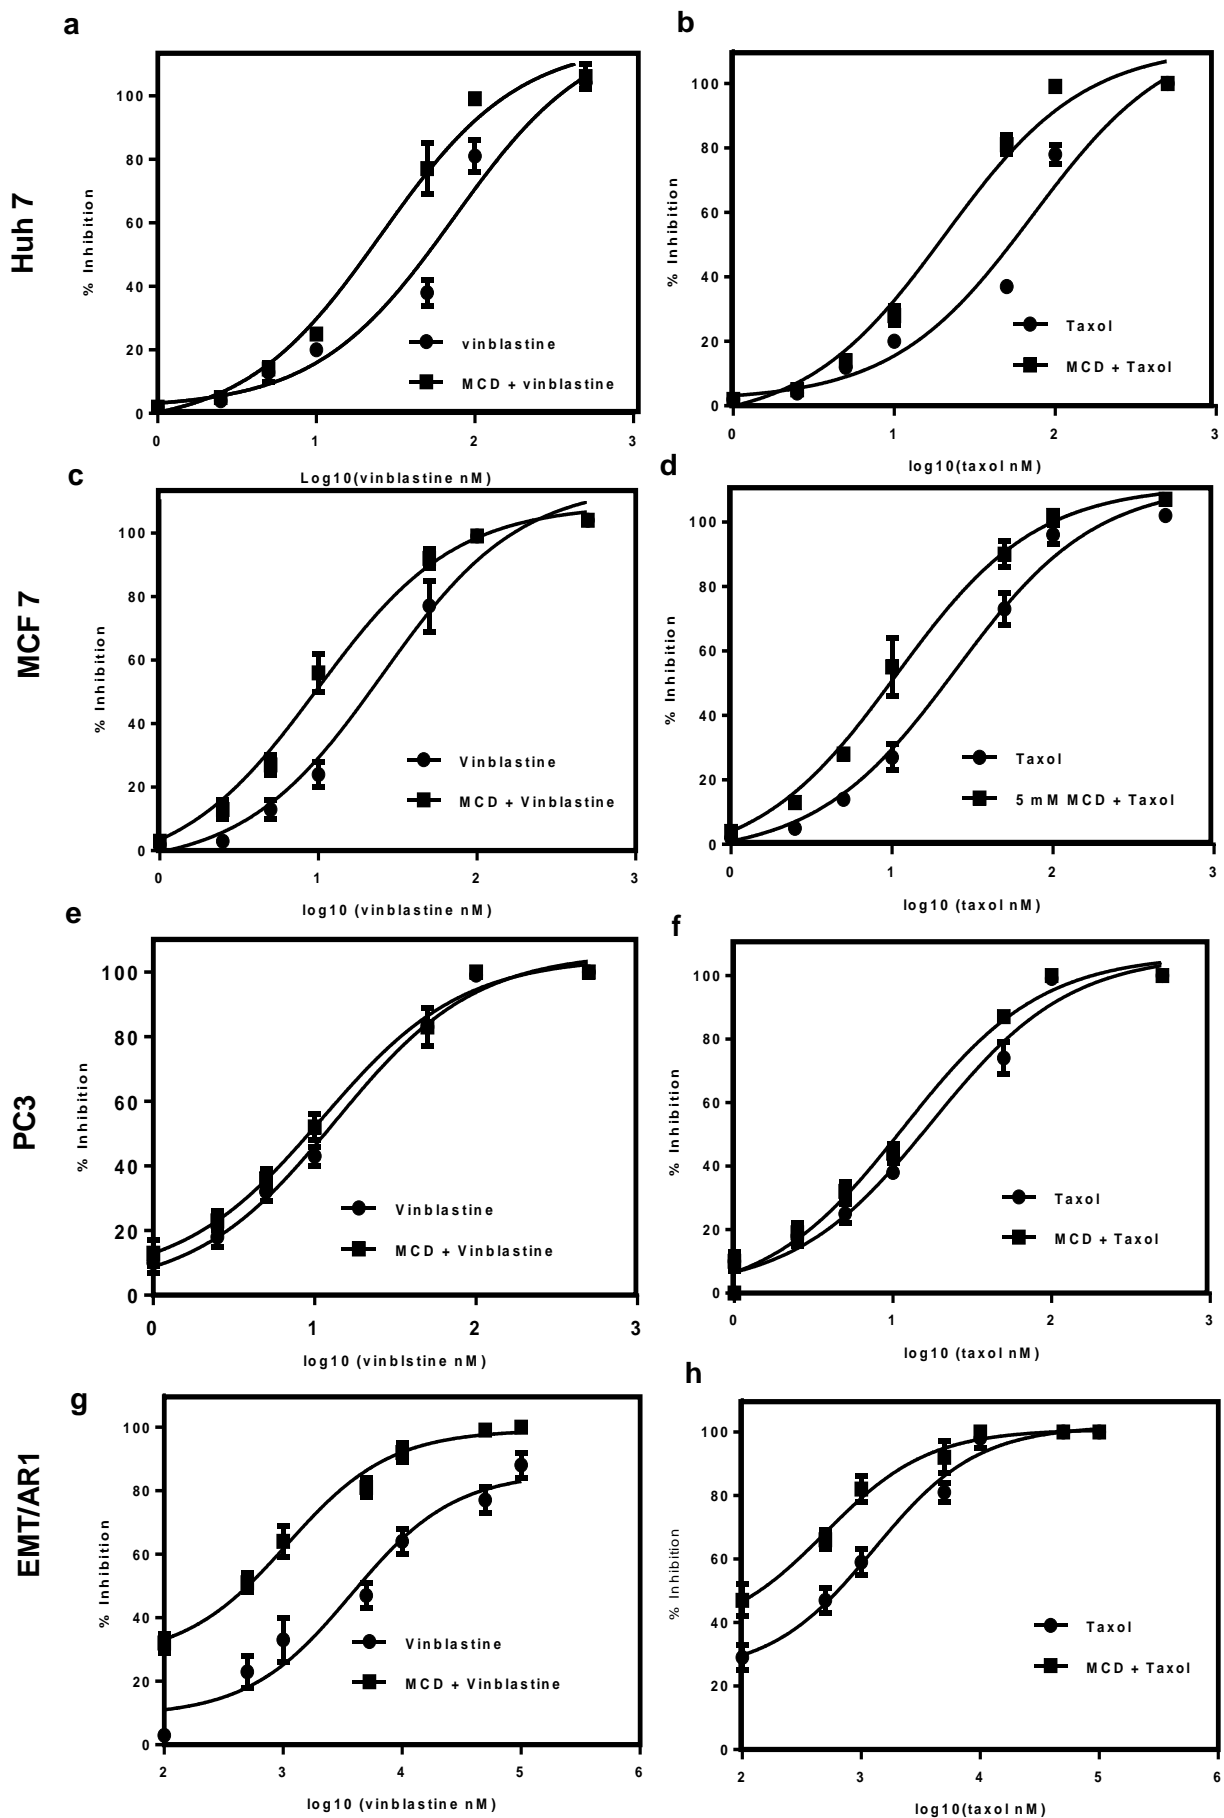

**Supplementary Figure 2: MCD augmented the antiproliferative activity of vinblastine and taxol in several types of cancer cells.** Cells were treated with 1 mM MCD for 4 h and then replaced with either fresh media alone or fresh media containing different concentrations of either vinblastine or taxol for 24 h. The inhibition of cell proliferation was calculated by the sulforhodamine B assay. a) Huh 7 cells - vinblastine ( $p < 0.01$ ) b) Huh 7 cells - taxol ( $p < 0.01$ ) c) MCF 7 cells - vinblastine ( $p < 0.01$ ) d) MCF 7 cells - taxol ( $p < 0.01$ ) e) PC3 cells - vinblastine ( $p < 0.05$ ) f) PC3 cells - taxol ( $p < 0.05$ ) g) EMT/AR1 cells - vinblastine ( $p < 0.01$ ) f) EMT/AR1 cells - taxol ( $p < 0.01$ ). Data are averages of three independent experiments, and error bars represent the SD.
